# Supplementary material
Source: PubMed Central journal article supplement (PMC5291719)
Supplement: supp_pp.16.01045_PP2016-01045R1_Supplemental_Table_1_online.pdf [file supp_pp.16.01045_PP2016-01045R1_Supplemental_Table_1_online.pdf]

**Supplemental Table 1 online.** Overview of sample distribution within the flow cell, biological replication, RNA-seq output and mapping results.

| Treatment     | Genotype | Biological replicate | Illumina indexed adapter | Lane              | Total - raw       | Uniquely mapped on genome <sup>a</sup> | %                 | Uniquely mapped on genome without stacks <sup>b</sup> | %                 | Uniquely mapped without stacks mapped on FGS <sup>c</sup> | %  |
|---------------|----------|----------------------|--------------------------|-------------------|-------------------|----------------------------------------|-------------------|-------------------------------------------------------|-------------------|-----------------------------------------------------------|----|
| Control       | B73      | 1                    | AR001                    | 1                 | 30.180.272        | 27.200.167                             | 90                | 15.491.837                                            | 57                | 12.019.096                                                | 78 |
|               |          | 2                    | AR008                    | 3                 | 25.459.356        | 22.726.923                             | 89                | 15.030.289                                            | 66                | 11.601.942                                                | 77 |
|               |          | 3                    | AR010                    | 6                 | 22.252.697        | 20.084.273                             | 90                | 12.402.481                                            | 62                | 9.690.231                                                 | 78 |
|               |          | 4                    | AR011                    | 7                 | 8.085.432         | 7.213.388                              | 89                | 5.515.195                                             | 76                | 4.256.678                                                 | 77 |
|               | Mo17     | 1                    | AR008                    | 1                 | 25.510.816        | 22.267.909                             | 87                | 14.403.243                                            | 65                | 10.925.060                                                | 76 |
|               |          | 2                    | AR001                    | 3                 | 47.712.454        | 41.871.784                             | 88                | 25.172.752                                            | 60                | 19.173.538                                                | 76 |
|               |          | 3                    | AR011                    | 6                 | 21.797.918        | 18.950.993                             | 87                | 12.449.894                                            | 66                | 9.561.235                                                 | 77 |
|               |          | 4                    | AR010                    | 7                 | 16.207.101        | 14.213.683                             | 88                | 9.654.736                                             | 68                | 7.395.860                                                 | 77 |
|               | B73xMo17 | 1                    | AR010                    | 1                 | 20.020.741        | 17.757.055                             | 89                | 12.229.253                                            | 69                | 9.339.808                                                 | 76 |
|               |          | 2                    | AR011                    | 3                 | 38.101.382        | 33.972.113                             | 89                | 21.420.400                                            | 63                | 16.520.899                                                | 77 |
|               |          | 3                    | AR001                    | 6                 | 36.301.348        | 32.263.851                             | 89                | 19.067.824                                            | 59                | 14.662.376                                                | 77 |
|               |          | 4                    | AR008                    | 7                 | 29.114.503        | 25.687.432                             | 88                | 16.167.289                                            | 63                | 12.402.023                                                | 77 |
|               | Mo17xB73 | 1                    | AR011                    | 1                 | 24.528.086        | 21.774.753                             | 89                | 14.307.676                                            | 66                | 10.561.778                                                | 74 |
|               |          | 2                    | AR010                    | 3                 | 23.173.809        | 20.239.820                             | 87                | 14.397.859                                            | 71                | 10.892.111                                                | 76 |
|               |          | 3                    | AR008                    | 6                 | 36.593.846        | 32.489.740                             | 89                | 19.656.741                                            | 61                | 15.029.311                                                | 76 |
|               |          | 4                    | AR001                    | 7                 | 16.845.158        | 14.940.701                             | 89                | 10.416.766                                            | 70                | 7.967.265                                                 | 76 |
| Water deficit | B73      | 1                    | AR001                    | 2                 | 19.119.496        | 17.189.324                             | 90                | 11.533.087                                            | 67                | 8.919.097                                                 | 77 |
|               |          | 2                    | AR008                    | 4                 | 12.832.759        | 11.320.171                             | 88                | 8.361.288                                             | 74                | 6.457.906                                                 | 77 |
|               |          | 3                    | AR010                    | 5                 | 23.629.579        | 21.268.876                             | 90                | 14.562.064                                            | 68                | 11.295.448                                                | 78 |
|               |          | 4                    | AR011                    | 8                 | 23.522.007        | 21.208.212                             | 90                | 13.080.329                                            | 62                | 10.220.342                                                | 78 |
|               | Mo17     | 1                    | AR008                    | 2                 | 20.519.875        | 18.026.192                             | 88                | 11.954.871                                            | 66                | 9.175.607                                                 | 77 |
|               |          | 2                    | AR001                    | 4                 | 15.943.346        | 13.950.944                             | 88                | 9.730.731                                             | 70                | 7.457.661                                                 | 77 |
|               |          | 3                    | AR011                    | 5                 | 35.003.386        | 30.656.151                             | 88                | 20.785.119                                            | 68                | 15.861.972                                                | 76 |
|               |          | 4                    | AR010                    | 8                 | 26.595.536        | 23.221.313                             | 87                | 15.083.708                                            | 65                | 11.490.660                                                | 76 |
|               | B73xMo17 | 1                    | AR010                    | 2                 | 20.047.868        | 17.817.017                             | 89                | 12.413.020                                            | 70                | 9.462.904                                                 | 76 |
|               |          | 2                    | AR011                    | 4                 | 15.611.343        | 13.852.834                             | 89                | 9.988.047                                             | 72                | 7.661.078                                                 | 77 |
|               |          | 3                    | AR001                    | 5                 | 36.086.599        | 31.988.517                             | 89                | 21.743.949                                            | 68                | 16.553.541                                                | 76 |
|               |          | 4                    | AR008                    | 8                 | 30.529.098        | 27.033.306                             | 89                | 17.207.938                                            | 64                | 13.155.536                                                | 76 |
|               | Mo17xB73 | 1                    | AR011                    | 2                 | 24.501.823        | 21.735.510                             | 89                | 14.424.454                                            | 66                | 10.939.414                                                | 76 |
|               |          | 2                    | AR010                    | 4                 | 10.448.405        | 9.299.841                              | 89                | 6.978.297                                             | 75                | 5.375.433                                                 | 77 |
|               |          | 3                    | AR008                    | 5                 | 30.966.840        | 27.504.910                             | 89                | 19.478.237                                            | 71                | 14.859.292                                                | 76 |
|               |          | 4                    | AR001                    | 8                 | 19.716.300        | 17.515.049                             | 89                | 11.983.982                                            | 68                | 9.196.910                                                 | 77 |
| <b>Mean</b>   |          |                      |                          | <b>24.592.474</b> | <b>21.788.836</b> | <b>89</b>                              | <b>14.284.167</b> | <b>67</b>                                             | <b>10.940.063</b> | <b>77</b>                                                 |    |

<sup>a</sup> Mapped to the reference genome (B73 RefGenV2; Schnable et al., 2009)

<sup>b</sup> After removal of stacked reads i.e. redundant reads sharing the same start and end coordinate, sequencing direction, an

<sup>c</sup> Mapped to the gene models of the "filtered gene set" (FGS\_v2) of *Zea mays* (Release 5.b)
