# Supplementary material
Source: PubMed Central journal article supplement (PMC5291719)
Supplement: supp_pp.16.01045_PP2016-01045R1_Supplemental_Table_2_online.pdf [file supp_pp.16.01045_PP2016-01045R1_Supplemental_Table_2_online.pdf]

**Supplemental Table 2 online.** Genes whose allelic expression levels in hybrids differ from the expected values after control and PEG treatment.

|               |                       | Genes showing unexpected allelic expression ratio |                |      |                               |                |      |
|---------------|-----------------------|---------------------------------------------------|----------------|------|-------------------------------|----------------|------|
| Treatment     | Hybrid                | FDR <5%                                           | Total          |      | Nonadditively expressed genes |                |      |
|               |                       |                                                   | Overlap        |      | FDR <5%                       | Overlap        |      |
|               |                       |                                                   | E <sup>c</sup> | O    |                               | E <sup>c</sup> | O    |
| Control       | B73xMo17 <sup>a</sup> | 491                                               | 27             | 418* | 125                           | 4              | 93*  |
|               | Mo17xB73 <sup>b</sup> | 541                                               |                |      | 324                           |                |      |
| Water deficit | B73xMo17 <sup>a</sup> | 563                                               | 32             | 437* | 306                           | 8              | 163* |
|               | Mo17xB73 <sup>b</sup> | 550                                               |                |      | 238                           |                |      |
| Control       | B73xMo17 <sup>a</sup> | 491                                               | 27             | 177* | 125                           | 4              | 52*  |
| Water deficit |                       | 563                                               |                |      | 306                           |                |      |
| Control       | Mo17xB73 <sup>b</sup> | 541                                               | 29             | 188* | 324                           | 8              | 89*  |
| Water deficit |                       | 550                                               |                |      | 238                           |                |      |

Expected allelic expression levels are calculated from the expression level ratios of their parents: <sup>a</sup>  $B_{B73}/M_{Mo17} \neq B_{B73xMo17}/M_{B73xMo17}$ ; <sup>b</sup>  $B_{B73}/M_{Mo17} \neq B_{Mo17xB73}/M_{Mo17xB73}$ . All genes for which the depicted criteria are fulfilled by applying a false discovery rate (FDR) of 5% are depicted.

<sup>c</sup> Expected (E) values were calculated as [(# of genes with unexpected allelic ratio in B73xMo17) x (# of genes with unexpected allelic ratio in Mo17xB73)] / (total # of genes with B73-Mo17 SNP position) The numbers of expected and observed (O) overlapping genes were compared using a  $\chi^2$ -test. Significant differences between expected and observed values are indicated by \*:  $p \leq 0.01$ .
