# Supplementary material
Source: PubMed Central journal article supplement (PMC5291719)
Supplement: supp_pp.16.01045_PP2016-01045R1_Supplemental_Table_3_online.pdf [file supp_pp.16.01045_PP2016-01045R1_Supplemental_Table_3_online.pdf]

**Supplemental Table 3 online.** Genotype and treatment-specific activity of expressed genes. Green background: stable; yellow background: genotype-specific activity changes dependent on the treatment; dark green background: stable SPE\_M and SPE\_B genes; green frame: stable and dynamic SPE genes.

|                                       |                                         | Water defici treatment (-0.8 MPa) |                   |         |         |         |         |         |         |         |         |         |         |         |         |         |         |                    |        |
|---------------------------------------|-----------------------------------------|-----------------------------------|-------------------|---------|---------|---------|---------|---------|---------|---------|---------|---------|---------|---------|---------|---------|---------|--------------------|--------|
|                                       |                                         | 1                                 | 2                 | 3       | 4       | 5       | 6       | 7       | 8       | 9       | 10      | 11      | 12      | 13      | 14      | 15      | 16      |                    |        |
| Control treatment (dH <sub>2</sub> O) | genotype-specific activity <sup>1</sup> | 0-0-0-0                           | 0-0-0-1           | 0-0-1-0 | 0-0-1-1 | 0-1-0-0 | 0-1-0-1 | 0-1-1-0 | 0-1-1-1 | 1-0-0-0 | 1-0-0-1 | 1-0-1-0 | 1-0-1-1 | 1-1-0-0 | 1-1-0-1 | 1-1-1-0 | 1-1-1-1 | Σ                  |        |
|                                       | 1                                       | 0-0-0-0                           | 2712 <sup>2</sup> | 23      | 52      | 14      | 106     | 10      | 9       | 16      | 89      | 14      | 18      | 23      | 4       | 1       | 1       | 28                 | 3120   |
|                                       | 2                                       | 0-0-0-1                           | 32                | 11      | 7       | 16      | 11      | 1       | 0       | 9       | 2       | 1       | 0       | 7       | 0       | 1       | 0       | 2                  | 100    |
|                                       | 3                                       | 0-0-1-0                           | 14                | 0       | 3       | 4       | 1       | 1       | 3       | 3       | 2       | 2       | 1       | 6       | 0       | 1       | 0       | 1                  | 42     |
|                                       | 4                                       | 0-0-1-1                           | 7                 | 2       | 2       | 11      | 2       | 2       | 2       | 6       | 1       | 3       | 1       | 5       | 1       | 0       | 1       | 3                  | 49     |
|                                       | 5                                       | 0-1-0-0                           | 104               | 3       | 8       | 3       | 241     | 38      | 56      | 52      | 2       | 0       | 0       | 1       | 16      | 6       | 7       | 26                 | 563    |
|                                       | 6                                       | 0-1-0-1                           | 6                 | 3       | 3       | 3       | 31      | 16      | 19      | 75      | 2       | 0       | 0       | 0       | 2       | 1       | 0       | 13                 | 174    |
|                                       | 7                                       | 0-1-1-0                           | 12                | 2       | 1       | 0       | 33      | 10      | 16      | 35      | 1       | 0       | 0       | 0       | 3       | 2       | 7       | 17                 | 139    |
|                                       | 8                                       | 0-1-1-1                           | 8                 | 3       | 1       | 5       | 28      | 28      | 34      | 857     | 0       | 0       | 0       | 3       | 0       | 4       | 1       | 172                | 1144   |
|                                       | 9                                       | 1-0-0-0                           | 77                | 2       | 5       | 6       | 1       | 0       | 0       | 2       | 114     | 12      | 18      | 22      | 8       | 5       | 5       | 9                  | 286    |
|                                       | 10                                      | 1-0-0-1                           | 5                 | 3       | 1       | 4       | 1       | 0       | 0       | 0       | 14      | 11      | 3       | 32      | 0       | 1       | 1       | 4                  | 80     |
|                                       | 11                                      | 1-0-1-0                           | 7                 | 2       | 1       | 2       | 0       | 1       | 0       | 0       | 20      | 6       | 11      | 19      | 1       | 0       | 4       | 10                 | 84     |
|                                       | 12                                      | 1-0-1-1                           | 8                 | 1       | 2       | 9       | 1       | 3       | 0       | 2       | 21      | 25      | 26      | 643     | 7       | 5       | 4       | 96                 | 853    |
|                                       | 13                                      | 1-1-0-0                           | 5                 | 1       | 1       | 0       | 4       | 1       | 1       | 1       | 6       | 0       | 3       | 2       | 9       | 3       | 9       | 10                 | 56     |
|                                       | 14                                      | 1-1-0-1                           | 3                 | 0       | 0       | 0       | 2       | 3       | 3       | 2       | 1       | 1       | 0       | 2       | 3       | 5       | 0       | 15                 | 40     |
|                                       | 15                                      | 1-1-1-0                           | 3                 | 0       | 1       | 1       | 1       | 0       | 2       | 4       | 6       | 1       | 2       | 4       | 8       | 2       | 9       | 32                 | 76     |
|                                       | 16                                      | 1-1-1-1                           | 9                 | 2       | 3       | 4       | 20      | 7       | 8       | 119     | 4       | 8       | 8       | 72      | 20      | 35      | 39      | 22,822             | 23,180 |
|                                       | Σ                                       | 3012                              | 58                | 91      | 82      | 483     | 121     | 153     | 1183    | 285     | 84      | 91      | 841     | 82      | 72      | 88      | 23,260  | Σ diagonal: 27,491 |        |

<sup>1</sup> Expression in genotypes: B73-Mo17-B73xMo17-Mo17xB73

<sup>2</sup> 2,712 genes were inactive, as they did not reach the selected threshold T of  $\geq 3$  reads per thousand bases of gene length (see methods).
