# Supplementary material
Source: PubMed Central journal article supplement (PMC5291719)
Supplement: supp_pp.16.01045_PP2016-01045R1_Supplemental_Table_4_online.pdf [file supp_pp.16.01045_PP2016-01045R1_Supplemental_Table_4_online.pdf]

**Table S4: Genomic presence/absence variation (PAV) could explain between 2.5% and 15% of SPE\_B expression patterns.** All SPE\_M genes were detected in the B73 genome and thus cannot be explained by PAV (data not shown). The Mo17 genome assembly is not completely sequenced yet. However, among 1470 SPE\_M genes, only 7 (0.5%) were not detected with at least 90% coverage in the Mo17 genome. Among 1051 genes displaying SPE\_B, 261 (25%) were not detected in the Mo17 genome sequence. Up to 155 SPE\_B genes (15%) could be putative genomic PAVs in Mo17 because of their very low expression, but for only for 26 (2.5%) genes no RNA sequencing reads were detected in Mo17 making them very likely candidates for genomic PAV.

|                                                                           | SPE_B              |
|---------------------------------------------------------------------------|--------------------|
| Total                                                                     | 1051               |
| BLAST match in Mo17 genome at >90% sequence identity and >90% coverage    | 790                |
| No BLAST match in Mo17 genome at >90% sequence identity and >90% coverage | 261                |
| Expression level of 261 putative PAVs in Mo17                             | # of putative PAVs |
| None or less than 0.1 FPKM                                                | 155                |
| No RNA sequencing reads                                                   | 26                 |
